# Supplementary material for: Clonal Hematopoiesis Risk Score and All-Cause and Cardiovascular Mortality in Older Adults
Source: PubMed Central journal article supplement (PMC10794939; doi:10.1001/jamanetworkopen.2023.51927), 2024-01-17
Supplement: jamanetwopen-e2351927-s001.pdf [file jamanetwopen-e2351927-s001.pdf]

## Supplemental Online Content

Saadatagah S, Uddin MM, Weeks LD, et al. Clonal hematopoiesis risk score and all-cause and cardiovascular mortality in older adults. *JAMA Netw Open*. 2024;7(1):e2351927. doi:10.1001/jamanetworkopen.2023.51927

**eAppendix.** Supplemental Methods

**eReferences**

**eTable 1.** ICD Codes Used to Define Causes of Death

**eTable 1.** Clonal Hematopoiesis Driver Gene Frequency in the Study Population

**eTable 3.** Distribution of CHRS Components in Participants With CHIP/CCUS and by CHRS Risk Group

**eTable 4.** All-Cause and Disease-Specific Mortality by CHRS Risk Group in Inverse Probability of Attrition Weighting Analysis

**eTable 5.** Association of CHRS With Incident and Recurrent Cardiovascular Disease

**eFigure 1.** Number of Individuals With 1, 2, 3, and  $\geq 4$  Variants in the Study Population

**eFigure 2.** Cumulative Incidence and Disease-Specific Mortality by CHIP/CCUS Status

This supplemental material has been provided by the authors to give readers additional information about their work.

## eAppendix. Supplemental Methods

### Covariates

Sex, race, and age were self-reported; a goal of the Atherosclerosis Risk in Communities (ARIC) study is to measure how cardiovascular risk factors, medical care, and outcomes vary by race, sex, place, and time. Height and weight were measured by trained personnel and used to calculate body mass index. Systolic and diastolic blood pressure were measured with an automatic sphygmomanometer at ARIC visit 5 by a certified trained technician using an appropriately sized cuff.<sup>1</sup> An enzymatic assay was used to quantify total cholesterol and high-density lipoprotein cholesterol.<sup>2</sup> Diabetes was defined as fasting serum glucose level  $\geq 126$  mg/dL or nonfasting serum glucose level  $\geq 200$  mg/dL, self-reported diabetes diagnosed by a physician, or use of hypoglycemic medications. Hematologic malignancies were ascertained using ICD-O-1: 169, 196; ICD-O-2: 42, 77; ICD-O-3: 42, 77; ICD-8: 120.3–120.7; ICD-9:200–208; and ICD-10: 81–86, 88, 90–96. Coronary heart disease and stroke were defined as self-reported myocardial infarction or stroke (ischemic and hemorrhagic) before visit 1 or ARIC-adjudicated myocardial infarction or stroke, silent myocardial infarction identified by ECG changes, or coronary revascularization afterward.<sup>3</sup> Heart failure (HF) was determined by diagnosis code (ICD-9 code 428) or self-reported HF prior to 2005 or by adjudication by an expert panel since 2005.<sup>4</sup>

### CHIP ascertainment

Somatic mutations were identified from whole-exome sequencing (WES) using Mutect2 software<sup>5</sup> on the Terra platform (<https://portal.firecloud.org/?return=terra#methods/gatk/mutect2-gatk4/21>), and CHIP was detected using a publicly available pipeline (<https://app.terra.bio/#workspaces/terra-outreach/CHIP-Detection-Mutect2/>). To minimize potential artifacts in the Mutect2 calls, a panel-of-normal (PON) was created from 100 random HiSeq WES from the youngest participants, and 1000 Genomes PON was used for the NovaSeq WES. In addition, Genome Aggregation Database (gnomAD) was used to limit germline variants in the somatic mutation call. Mutect2 calls were further filtered, and variants were kept if (i) total depth of coverage  $\geq 20$ , (ii) number of reads supporting the alternate allele  $\geq 3$ , (iii)  $\geq 1$  read in both forward and reverse direction supporting the alternate allele, (iv) variant allele fraction  $\geq 0.02$ , (v) gnomAD allele frequency  $\leq 0.001$  (not hotspot mutations). Finally, CHIP mutations that passed sequence-based filtering were manually curated. To identify CHIP, pathogenic variants were queried in 69 genes known to drive clonal hematopoiesis and myeloid malignancies.<sup>6–8</sup> The detailed CHIP calling pipeline was previously reported<sup>7,9</sup> (<https://app.terra.bio/#workspaces/terra-outreach/CHIP-Detection-Mutect>). A special approach was used to identify somatic variants in U2AF1 since an erroneous segmental duplication in the hg38 reference genome resulted in a mapping score of zero for this gene during the sequence alignment from FASTQ to BAM/CRAM. We used a custom script ([https://github.com/MMesbahU/U2AF1\\_pileup](https://github.com/MMesbahU/U2AF1_pileup)) to recover hotspot mutations: S34F, S34Y, R156H, Q157P, and Q157R. A minimum of 5 supporting reads for alternate alleles was required to include a somatic mutation in U2AF1.

### CHRS calculation

The clonal hematopoiesis risk score was calculated using 8 factors: a) single *DNMT3A* (present: 0.5 points; absent: 1 point); b) high-risk mutation (absent: 1 point; present: 2.5 points); c) number of mutations (1: 1 point;  $\geq 2$ : 2 points); d) variant allele frequency ( $< 0.2$ : 1 point;  $\geq 0.2$ : 2 points); e) red cell distribution width ( $< 15$ : 1 point;  $\geq 15$ : 2.5 points), f) mean corpuscular volume ( $< 100$ : 1 point;  $\geq 100$ : 2.5 points); g) cytopenia (absent: 1 point; present: 1.5 points); h) age ( $< 65$ : 1 point;  $\geq 65$ : 1.5 points). High-risk mutation was defined as a mutation in splicing factors (*SF3B1*, *SRSF2*, or *ZRSR2*), AML-like genes (*IDH1*, *IDH2*, *RUNX1*, or *FLT3*), *JAK2*, or *TP53*. Cytopenia was defined as hemoglobin  $< 13$  g/dL in males or  $< 12$  g/dL in females, platelets  $< 150,000 \mu\text{L}^{-1}$ , or granulocyte absolute count  $< 1800 \mu\text{L}^{-1}$ .

### Addressing survival bias using inverse probability of attrition weighting

We used the inverse probability of attrition weighting (IPAW) method<sup>10</sup> to evaluate and correct the possible effects of selective attrition. We developed a logistic regression model, predicting attrition due to mortality and other loss to follow-up (censoring) from visit 1 to visit 5. The model included age, sex, race \* center, hypertension, diabetes, smoking, body mass index, coronary artery disease, HF, and stroke at visit 1. No participants had known solid or hematologic malignancies at the time of enrollment at visit 1. The area under the curve was 0.74. The weight for visit 5 was the inverse of the fitted values (ranging from 1.03 to 5.80) and was added as a covariate to the Fine–Gray competing risk regression model. Other covariates were age, sex, race, center, hypertension, diabetes, smoking status, coronary artery disease, HF, and history of solid cancer.

**Studying the association of CHRS with incident/recurrent cardiovascular disease**

The association of CHRS with incident/recurrent events was studied using the Fine–Gray competing risk regression model. Cardiovascular disease was defined as the composite endpoint of coronary artery disease, HF, and stroke (defined as above). The event date for participants with no cardiovascular disease at the time of enrollment was the time of the first incident event, and for participants with cardiovascular disease at the time of enrollment was the time of the first recurrent event. The model was adjusted for age, sex, race, center, hypertension, diabetes, and smoking. The event date was considered the endpoint, and participants without outcomes were censored at loss to follow-up or death. The last follow-up date for individuals without events was December 31, 2017, for participants from the Jackson center and December 31, 2019, for other centers.

## eReferences

1. Madan N, Lee AK, Matsushita K, et al. Relation of Isolated Systolic Hypertension and Pulse Pressure to High-Sensitivity Cardiac Troponin-T and N-Terminal pro-B-Type Natriuretic Peptide in Older Adults (from the Atherosclerosis Risk in Communities Study). *Am J Cardiol*. Jul 15 2019;124(2):245-252. doi:10.1016/j.amjcard.2019.04.030
2. Sharrett AR, Patsch W, Sorlie PD, Heiss G, Bond MG, Davis CE. Associations of lipoprotein cholesterols, apolipoproteins A-I and B, and triglycerides with carotid atherosclerosis and coronary heart disease: the Atherosclerosis Risk in Communities (ARIC) Study. *Arterioscler Thromb*. Jul 1994;14(7):1098-104.
3. White AD, Folsom AR, Chambless LE, et al. Community surveillance of coronary heart disease in the Atherosclerosis Risk in Communities (ARIC) Study: methods and initial two years' experience. *J Clin Epidemiol*. Feb 1996;49(2):223-33. doi:10.1016/0895-4356(95)00041-0
4. Loefer LR, Rosamond WD, Chang PP, Folsom AR, Chambless LE. Heart failure incidence and survival (from the Atherosclerosis Risk in Communities study). *Am J Cardiol*. Apr 1 2008;101(7):1016-22. doi:10.1016/j.amjcard.2007.11.061
5. Benjamin D, Sato T, Cibulskis K, Getz G, Stewart C, Lichtenstein L. Calling somatic SNVs and indels with Mutect2. *BioRxiv*. 2019:861054.
6. Jaiswal S, Natarajan P, Silver AJ, et al. Clonal hematopoiesis and risk of atherosclerotic cardiovascular disease. *New England Journal of Medicine*. 2017;377(2):111-121.
7. Bick AG, Weinstock JS, Nandakumar SK, et al. Inherited causes of clonal haematopoiesis in 97,691 whole genomes. *Nature*. 2020;586(7831):763-768.
8. Gibson CJ, Lindsley RC, Tchekmedyian V, et al. Clonal hematopoiesis associated with adverse outcomes after autologous stem-cell transplantation for lymphoma. *Journal of Clinical Oncology*. 2017;35(14):1598.
9. Uddin MM, Yu Z, Weinstock JS, et al. Germline genomic and phenomic landscape of clonal hematopoiesis in 323,112 individuals. *medRxiv*. 2022:2022.07.29.22278015.
10. Weuve J, Tchetgen EJT, Glymour MM, et al. Accounting for bias due to selective attrition: the example of smoking and cognitive decline. *Epidemiology (Cambridge, Mass)*. 2012;23(1):119.

**eTable 1. ICD Codes Used to Define Causes of Death**

| <b>Cause of death</b>    | <b>ICD9</b>                                            | <b>ICD10</b>                                                          |
|--------------------------|--------------------------------------------------------|-----------------------------------------------------------------------|
| Cardiovascular           | 393 to 459                                             | I-01 to I-99                                                          |
| Solid cancer             | 140 to 199, 210 to 237,<br>238.[-4, -71 to -76]<br>239 | C01 to C80, C-97 to C-99,<br>D-01 to D-44, D-47[-3, -4]<br>D-48, D-49 |
| Neurologic               | 290 to 389                                             | F-00 to F-99, G-00 to G-99                                            |
| Respiratory              | 460 to 519                                             | J-00 to J-99                                                          |
| Hematologic malignancies | 200 to 209<br>238.4, 238.71,<br>238.72-238.75, 238.76  | C-81 to C-96<br>D45, D46, D473, D474                                  |
| Infection                | 001 to 139                                             | A-00 to A-99, B-00 to B-99                                            |
| Other                    | All other codes                                        | All other codes                                                       |

Abbreviation: ICD, international classification of disease.

**eTable 2. Clonal Hematopoiesis Driver Gene Frequency in the Study Population**

| <b>Rank</b> | <b>Gene</b>                                                                                                                       | <b>Number</b> |
|-------------|-----------------------------------------------------------------------------------------------------------------------------------|---------------|
| 1           | <i>DNMT3A</i>                                                                                                                     | 499           |
| 2           | <i>TET2</i>                                                                                                                       | 230           |
| 3           | <i>ASXL1</i>                                                                                                                      | 84            |
| 4           | <i>PPM1D</i>                                                                                                                      | 39            |
| 5           | <i>SF3B1</i> <sup>a</sup>                                                                                                         | 36            |
| 6           | <i>SRSF2</i> <sup>a</sup>                                                                                                         | 28            |
| 7           | <i>TP53</i> <sup>a</sup>                                                                                                          | 25            |
| 8           | <i>ZNF318</i>                                                                                                                     | 24            |
| 9           | <i>ZBTB33</i>                                                                                                                     | 19            |
| 10          | <i>STAG2</i>                                                                                                                      | 16            |
| 11:12       | <i>SRCAP, YLPM1</i>                                                                                                               | 13            |
| 13:14       | <i>JAK2</i> , <sup>a</sup> <i>U2AF1</i>                                                                                           | 12            |
| 15          | <i>BRCC3</i>                                                                                                                      | 11            |
| 16          | <i>PDS5B</i>                                                                                                                      | 10            |
| 17:19       | <i>CBL, GNB1, ZRSR2</i> <sup>a</sup>                                                                                              | 8             |
| 20:22       | <i>ASXL2, IDH2</i> , <sup>a</sup> <i>NF1</i>                                                                                      | 6             |
| 23:25       | <i>KDM6A, PHIP, PRPF8</i>                                                                                                         | 5             |
| 26          | <i>NRAS</i>                                                                                                                       | 4             |
| 27:30       | <i>CREBBP, CUX1, KRAS, PTEN</i>                                                                                                   | 3             |
| 31:36       | <i>BCOR, BRAF, EP300, EZH2, NXF1, PHF6</i>                                                                                        | 2             |
| 37:48       | <i>BCORL1, CTCF, ETV6, IDH1</i> , <sup>a</sup> <i>IKZF2, MPL, PTPN11, RAD21, RUNX1</i> , <sup>a</sup> <i>SETBP1, SETD2, SUZ12</i> | 1             |

<sup>a</sup> High-risk genes.

**eTable 3. Distribution of CHRS Components in Participants With CHIP/CCUS and by CHRS Risk Group**

| <b>CHRS Component</b>      | <b>CHIP/CCUS<br/>(n = 938)</b> | <b>Low-Risk<br/>CHIP/CCUS<br/>(n = 562)</b> | <b>Intermediate-Risk<br/>CHIP/CCUS<br/>(n = 318)</b> | <b>High-Risk<br/>CHIP/CCUS<br/>(n = 58)</b> |
|----------------------------|--------------------------------|---------------------------------------------|------------------------------------------------------|---------------------------------------------|
| <b>Single DNMT3A</b>       |                                |                                             |                                                      |                                             |
| Present (0.5 points)       | 346 (35.9)                     | 292 (52.0)                                  | 54 (17.0)                                            | 0 (0.0)                                     |
| Absent (1.0 point)         | 592 (63.1)                     | 270 (48.0)                                  | 264 (83.0)                                           | 58 (100.0)                                  |
| <b>High risk mutation</b>  |                                |                                             |                                                      |                                             |
| Absent (1.0 point)         | 830 (88.5)                     | 562 (100)                                   | 248 (88.0)                                           | 20 (34.5)                                   |
| Present (2.5 points)       | 108 (11.5)                     | 0 (0.0)                                     | 70 (22.0)                                            | 38 (65.5)                                   |
| <b>Number of mutations</b> |                                |                                             |                                                      |                                             |
| 1 (1 point)                | 745 (79.4)                     | 533 (94.8)                                  | 203 (63.8)                                           | 9 (15.5)                                    |
| ≥ 2 (2 points)             | 193 (20.6)                     | 29 (5.2)                                    | 115 (36.2)                                           | 49 (84.5)                                   |
| <b>VAF</b>                 |                                |                                             |                                                      |                                             |
| < 0.2 (1 point)            | 702 (74.8)                     | 496 (88.3)                                  | 199 (62.6)                                           | 7 (12.1)                                    |
| ≥ 0.2 (2 points)           | 236 (25.2)                     | 66 (11.7)                                   | 119 (37.4)                                           | 51 (87.9)                                   |
| <b>Age</b>                 |                                |                                             |                                                      |                                             |
| < 65 (1 point)             | 0 (0.0)                        | 0 (0.0)                                     | 0 (0.0)                                              | 0 (0.0)                                     |
| ≥ 65 (1.5 points)          | 938 (100.0)                    | 562 (100.0)                                 | 318 (100.0)                                          | 58 (100.0)                                  |
| <b>RDW</b>                 |                                |                                             |                                                      |                                             |
| < 15 (1 point)             | 685 (73.0)                     | 532 (94.7)                                  | 139 (43.7)                                           | 14 (24.1)                                   |
| ≥ 15 (2.5 points)          | 253 (27.0)                     | 30 (5.3)                                    | 179 (56.3)                                           | 44 (75.9)                                   |
| <b>MCV</b>                 |                                |                                             |                                                      |                                             |
| < 100 (1 point)            | 899 (95.8)                     | 559 (99.5)                                  | 293 (92.1)                                           | 47 (81.0)                                   |
| ≥ 100 (2.5 points)         | 39 (4.2)                       | 3 (0.5)                                     | 25 (7.9)                                             | 11 (19.0)                                   |
| <b>Cytopenia</b>           |                                |                                             |                                                      |                                             |
| Absent (1.0 point)         | 612 (65.2)                     | 433 (77.0)                                  | 167 (52.5)                                           | 12 (20.7)                                   |
| Present (1.5 points)       | 326 (34.8)                     | 129 (23.0)                                  | 151 (47.5)                                           | 46 (79.3)                                   |

Data are presented as n (%).

Abbreviations: CCUS, clonal cytopenia of undetermined significance; CHIP, clonal hematopoiesis of indeterminate potential; CHRS, clonal hematopoiesis risk score; MCV, mean corpuscular volume; RDW, red cell distribution width; VAF, variant allele frequency.

**eTable 4. All-Cause and Disease-Specific Mortality by CHRS Risk Group in Inverse Probability of Attrition Weighting Analysis**

| CHRS Risk Group   | Death          | #at risk <sup>a</sup>   #events (%) | sHR (95% CI) <sup>b</sup> | P     |
|-------------------|----------------|-------------------------------------|---------------------------|-------|
| No CHIP/CCUS      | All cause      | 2933   570 (19.4)                   | Ref                       | -     |
| CHIP/CCUS         | All cause      | 938   254 (27.1)                    | 1.18 (1.01 - 1.38)        | 0.03  |
| Low-Risk          | All cause      | 562   128 (22.8)                    | 1.08 (0.89 - 1.31)        | 0.42  |
| Intermediate-Risk | All cause      | 318   93 (29.2)                     | 1.13 (0.90 - 1.42)        | 0.29  |
| High-Risk         | All cause      | 58   33 (56.9)                      | 2.52 (1.71 - 3.69)        | <.001 |
| No CHIP/CCUS      | Cardiovascular | 2933   189 (6.4)                    | Ref                       | -     |
| CHIP/CCUS         | Cardiovascular | 938   86 (9.2)                      | 1.17 (0.90 - 1.53)        | 0.24  |
| Low-Risk          | Cardiovascular | 562   40 (7.1)                      | 1.03 (0.73 - 1.47)        | 0.86  |
| Intermediate-Risk | Cardiovascular | 318   34 (10.7)                     | 1.14 (0.79 - 1.67)        | 0.48  |
| High-Risk         | Cardiovascular | 58   12 (20.7)                      | 2.91 (1.55 - 5.47)        | 0.001 |
| No CHIP/CCUS      | Solid cancer   | 2933   117 (4.0)                    | Ref                       | -     |
| CHIP/CCUS         | Solid cancer   | 938   49 (5.2)                      | 1.23 (0.88 - 1.72)        | 0.24  |
| Low-Risk          | Solid cancer   | 562   28 (5.0)                      | 1.20 (0.79 - 1.80)        | 0.39  |
| Intermediate-Risk | Solid cancer   | 318   17 (5.3)                      | 1.18 (0.70 - 1.99)        | 0.53  |
| High-Risk         | Solid cancer   | 58   4 (6.9)                        | 1.81 (0.67 - 4.85)        | 0.24  |
| No CHIP/CCUS      | Neurologic     | 2933   80 (2.7)                     | Ref                       | -     |
| CHIP/CCUS         | Neurologic     | 938   23 (2.5)                      | 0.69 (0.42 - 1.11)        | 0.12  |
| Low-Risk          | Neurologic     | 562   17 (3.0)                      | 0.87 (0.50 - 1.50)        | 0.62  |
| Intermediate-Risk | Neurologic     | 318   6 (1.9)                       | 0.50 (0.21 - 1.16)        | 0.10  |
| High-Risk         | Neurologic     | 58   0 (0.0)                        | NA                        | NA    |
| No CHIP/CCUS      | Respiratory    | 2933   64 (2.2)                     | Ref                       | -     |
| CHIP/CCUS         | Respiratory    | 938   25 (2.7)                      | 0.99 (0.62 - 1.60)        | 0.98  |
| Low-Risk          | Respiratory    | 562   9 (1.6)                       | 0.68 (0.33 - 1.37)        | 0.28  |
| Intermediate-Risk | Respiratory    | 318   13 (4.1)                      | 1.29 (0.69 - 2.40)        | 0.42  |
| High-Risk         | Respiratory    | 58   3 (5.2)                        | 1.71 (0.49 - 5.97)        | 0.40  |
| No CHIP/CCUS      | HM             | 2933   12 (0.4)                     | Ref                       | -     |
| CHIP/CCUS         | HM             | 938   17 (1.8)                      | 3.97 (1.79 - 8.8)         | 0.001 |
| Low-Risk          | HM             | 562   5 (0.9)                       | 2.11 (0.71 - 6.24)        | 0.180 |
| Intermediate-Risk | HM             | 318   6 (1.9)                       | 4.07 (1.52 - 10.92)       | 0.005 |
| High-Risk         | HM             | 58   6 (10.3)                       | 25.78 (7.52 - 88.34)      | <.001 |
| No CHIP/CCUS      | Infection      | 2933   13 (0.4)                     | Ref                       | -     |
| CHIP/CCUS         | Infection      | 938   6 (0.6)                       | 1.18 (0.46 - 2.98)        | 0.73  |
| Low-Risk          | Infection      | 562   3 (0.5)                       | 1.06 (0.31 - 3.66)        | 0.92  |
| Intermediate-Risk | Infection      | 318   2 (0.6)                       | 1.05 (0.24 - 4.59)        | 0.95  |
| High-Risk         | Infection      | 58   1 (1.7)                        | 3.01 (0.34 - 26.96)       | 0.32  |
| No CHIP/CCUS      | Other          | 2933   91 (3.1)                     | Ref                       | -     |
| CHIP/CCUS         | Other          | 938   47 (5.0)                      | 1.43 (1.00 - 2.04)        | 0.05  |
| Low-Risk          | Other          | 562   26 (4.6)                      | 1.39 (0.90 - 2.15)        | 0.14  |
| Intermediate-Risk | Other          | 318   15 (4.7)                      | 1.26 (0.72 - 2.21)        | 0.43  |
| High-Risk         | Other          | 58   6 (10.3)                       | 2.80 (1.26 - 6.22)        | 0.01  |

<sup>a</sup> The person-years for No CHIP/CCUS, Low-Risk, Intermediate-Risk, and High-Risk groups are 19194.1, 3675.0, 1942.4, and 302.9, respectively.

<sup>b</sup> Fine-Gray competing risk regression model, adjusted for age, sex, race, center, diabetes, smoking, coronary artery disease, heart failure, solid cancer, and inverse probability of attrition weighting from visit 1 to visit 5.

Abbreviation, CCUS, clonal cytopenia of undetermined significance; CHIP, clonal hematopoiesis of indeterminate potential; CHRS, clonal hematopoiesis risk score; CI, confidence interval; HM, hematologic malignancy; sHR, subdistribution hazard ratio.



**eTable 5. Association of CHRS With Incident and Recurrent Cardiovascular Disease**

| CHRS Risk Group   | Event       | #at risk <sup>a</sup>   #events (%) | sHR (95% CI) <sup>b</sup> | P     |
|-------------------|-------------|-------------------------------------|---------------------------|-------|
| No CHIP/CCUS      | Inc/Rec CVD | 2933   595 (20.3)                   | Ref                       | -     |
| CHIP/CCUS         | Inc/Rec CVD | 938   230 (24.5)                    | 1.07 (0.91 – 1.24)        | 0.420 |
| Low-Risk          | Inc/Rec CVD | 562   116 (20.6)                    | 0.93 (0.77 – 1.14)        | 0.500 |
| Intermediate-Risk | Inc/Rec CVD | 318   93 (29.2)                     | 1.21 (0.97 – 1.52)        | 0.095 |
| High-Risk         | Inc/Rec CVD | 58   21 (36.2)                      | 1.49 (0.99 – 2.26)        | 0.006 |

<sup>a</sup> The person-years for No CHIP/CCUS, Low-Risk, Intermediate-Risk, and High-Risk groups are 19194.1, 3675.0, 1942.4, and 302.9, respectively.

<sup>b</sup> Fine–Gray competing risk regression model is adjusted for age, sex, race, center, hypertension, diabetes, and smoking. Cardiovascular disease is defined as coronary artery disease, heart failure, and stroke. Abbreviation, CCUS, clonal cytopenia of undetermined significance; CHIP, clonal hematopoiesis of indeterminate potential; CHRS, clonal hematopoiesis risk score; CI, confidence interval; CVD, cardiovascular disease; Inc/Rec, Incident/Recurrent; sHR, subdistribution hazard ratio.

**eFigure 1. Number of Individuals With 1, 2, 3, and  $\geq 4$  Variants in the Study Population**

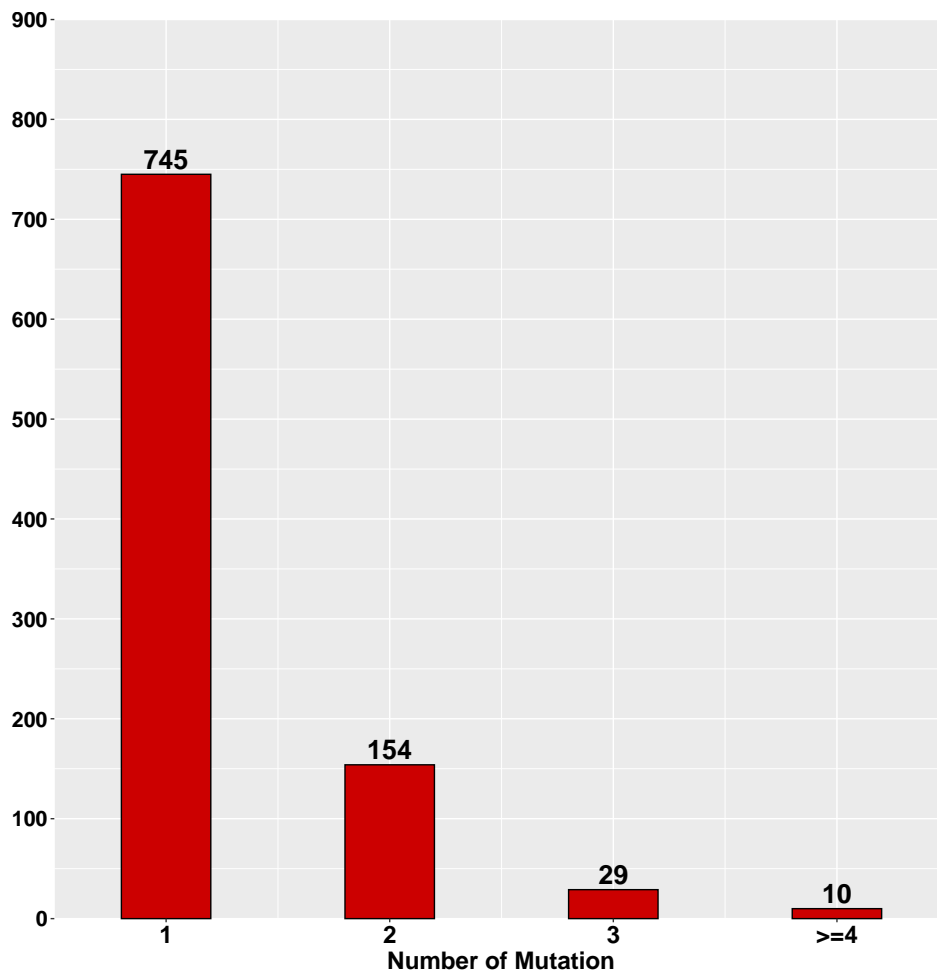

**eFigure 2. Cumulative Incidence and Disease-Specific Mortality by CHIP/CCUS Status**

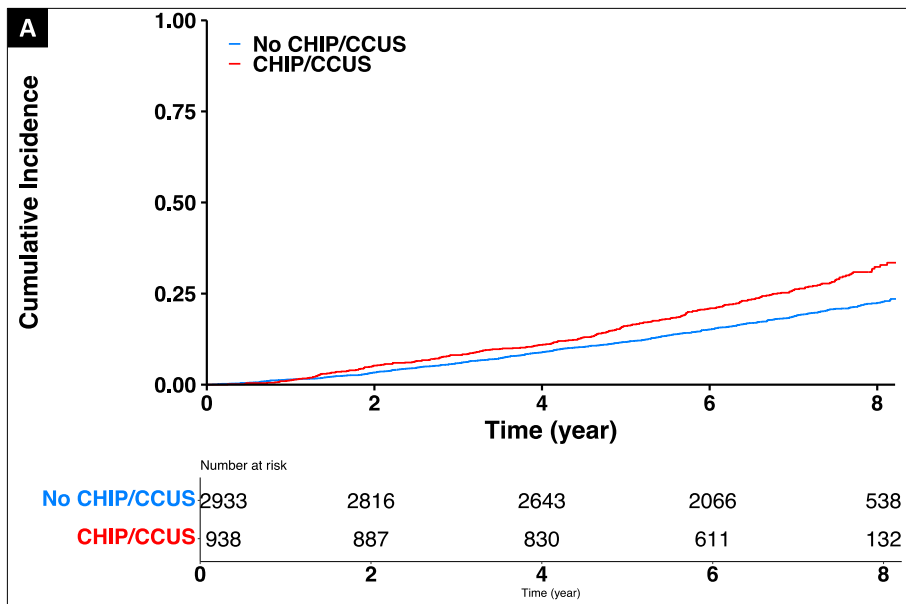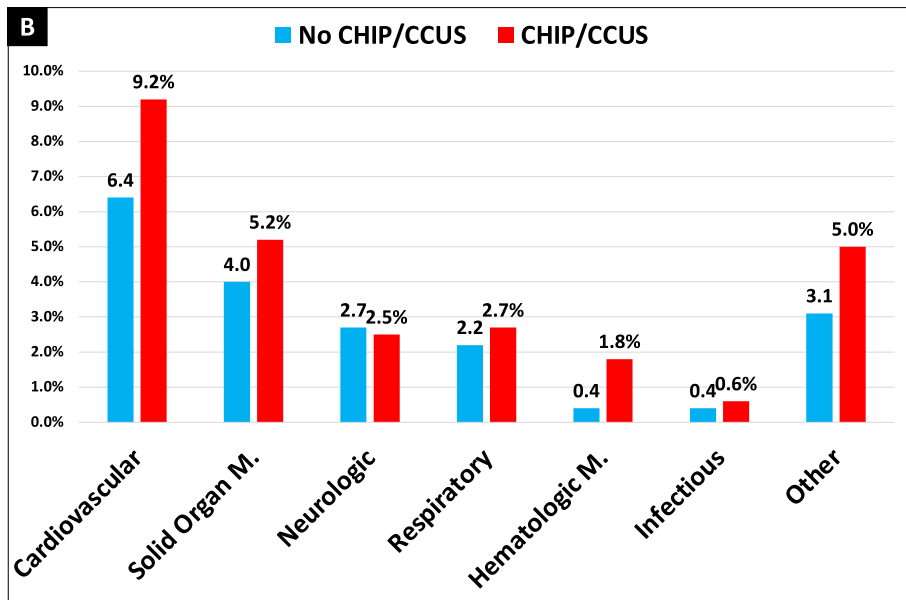

**A)** Cumulative incidence of death based on CHIP/CCUS status **B)** disease-specific mortality by CHIP/CCUS status.  
Abbreviations: CHIP, clonal hematopoiesis of indeterminate potential; CCUS, clonal cytopenia of undetermined significance.
