# Supplementary material for: Clonal Hematopoiesis Risk Score and All-Cause and Cardiovascular Mortality in Older Adults
Source: PubMed Central journal article supplement (PMC10794939; doi:10.1001/jamanetworkopen.2023.51927), 2024-01-17
Supplement: jamanetwopen-e2351927-s002.pdf [file jamanetwopen-e2351927-s002.pdf]

## Data Sharing Statement

Saadatagah. Clonal Hematopoiesis Risk Score and All-Cause and Cardiovascular Mortality in Older Adults. *JAMA Netw Open*. Published January 17, 2024.

doi:10.1001/jamanetworkopen.2023.51927

### Data

**Data available:** Yes

**Data types:** Deidentified participant data

**How to access data:** <https://biolincc.nhlbi.nih.gov/studies/atic/>

**When available:** With publication

### Supporting Documents

**Document types:** None

### Additional Information

**Who can access the data:** researchers must be registered on this site

**Types of analyses:** <https://biolincc.nhlbi.nih.gov/studies/atic/>

**Mechanisms of data availability:** <https://biolincc.nhlbi.nih.gov/studies/atic/>
